# Supplementary material
Source: MDPI journal article supplement (https://www.mdpi.com/2571-6255/4/3/56)
Supplement: s1 [file s1]

## Supplementary Materials

**Table S1.** Relative difference (%) of the percentile 50<sup>th</sup> and 90<sup>th</sup> (in parenthesis) from annual accumulated burned area (BA) and total scar number (SN)(according to Figure 3) between NFP and ZFP, and between ZFP and IFM in Xerente (a) and Araguaia (b) for each fire season: management fire season (MFS) and wildfires season (WFS).

| (a) Phases | MFS           |               | WFS          |              |
|------------|---------------|---------------|--------------|--------------|
|            | BA [%]        | SN [%]        | BA [%]       | SN [%]       |
| NFP/ZFP    | −67.8 (25.4)  | −60.0 (−26.8) | −0.2 (−4.9)  | −16.9 (−8.0) |
| ZFP/IFMP   | 273.2 (−34.2) | 225.0 (−30.0) | −7.3 (−15.1) | 5.3 (−9.0)   |

  

| (b) Phases | MFS           |              | WFS         |               |
|------------|---------------|--------------|-------------|---------------|
|            | BA [%]        | SN [%]       | BA [%]      | SN [%]        |
| NFP/ZFP    | −0.5 (319.7)  | −47.4 (41.3) | 3.0 (24.5)  | −28.2 (−11.1) |
| ZFP/IFMP   | 660.2 (−19.7) | 495.1 (71.1) | 1.7 (−23.5) | 23.7 (−4.2)   |

**Table S2.** Relative difference (%) of the percentile 50<sup>th</sup> and 90<sup>th</sup> (in parenthesis) from burned area (BA) of large scars, fire radiative power (FRP) and pyrogenic emission (PM<sub>2.5</sub>) distribution (Figure 4) between NFP and 2 and between ZFP and 3 in Xerente (a) and Araguaia (b) for wildfires season (WFS).

| (a) Phases | Difference [%] |            |                   |
|------------|----------------|------------|-------------------|
|            | BA             | FRP        | PM <sub>2.5</sub> |
| NFP/ZFP    | −10.4 (26.3)   | −1.7 (9.5) | 4.0 (16.3)        |
| ZFP/IFMP   | −3.7 (−17.9)   | 0.0 (−0.2) | 7.7 (−10.0)       |

  

| (b) Phases | Difference [%] |              |                   |
|------------|----------------|--------------|-------------------|
|            | BA             | FRP          | PM <sub>2.5</sub> |
| NFP/ZFP    | 19.9 (43.5)    | 10.0 (6.5)   | −25.0 (10.1)      |
| ZFP/IFMP   | −9.9 (−20.2)   | −3.4 (−10.3) | 22.0 (−18.2)      |

**Table S3.** The proportion of pixels (i.e., area) in each fire recurrence class: zero, low ( $\leq 0.6$  fire occurrence per year) and high ( $> 0.6$  fire occurrence per year) in Xerente (a) and Araguaia (b), according to Figure 5.

| (a) Fire recurrence class | Total area (ha) |         |         |
|---------------------------|-----------------|---------|---------|
|                           | Phase 1         | Phase 2 | Phase 3 |
| Zero                      | 28,320          | 30,324  | 35,901  |
| Low                       | 88,545          | 77,096  | 96,550  |
| High                      | 24,296          | 33,755  | 8,725   |

  

| (b) Fire recurrence class | Total area (ha) |         |         |
|---------------------------|-----------------|---------|---------|
|                           | Phase 1         | Phase 2 | Phase 3 |
| Zero                      | 392,386         | 229,980 | 332,469 |
| Low                       | 610,991         | 648,833 | 664,825 |
| High                      | 122,874         | 247,437 | 128,956 |

**Table S4.** Modal month in each class for all three phases on Xerente (a) and Araguaia (b), according to Figure 6.

| (a) Class  | Mode      |           |                  |
|------------|-----------|-----------|------------------|
|            | NFP       | ZFP       | IFMP             |
| Very small | July      | September | July & September |
| Small      | June      | July      | July             |
| Medium     | August    | August    | August           |
| Large      | September | September | September        |

  

| (b) Class  | Mode      |           |                  |
|------------|-----------|-----------|------------------|
|            | NFP       | ZFP       | IFMP             |
| Very small | September | September | July & September |
| Small      | September | September | July             |
| Medium     | August    | September | July & September |
| Large      | September | August    | July & September |

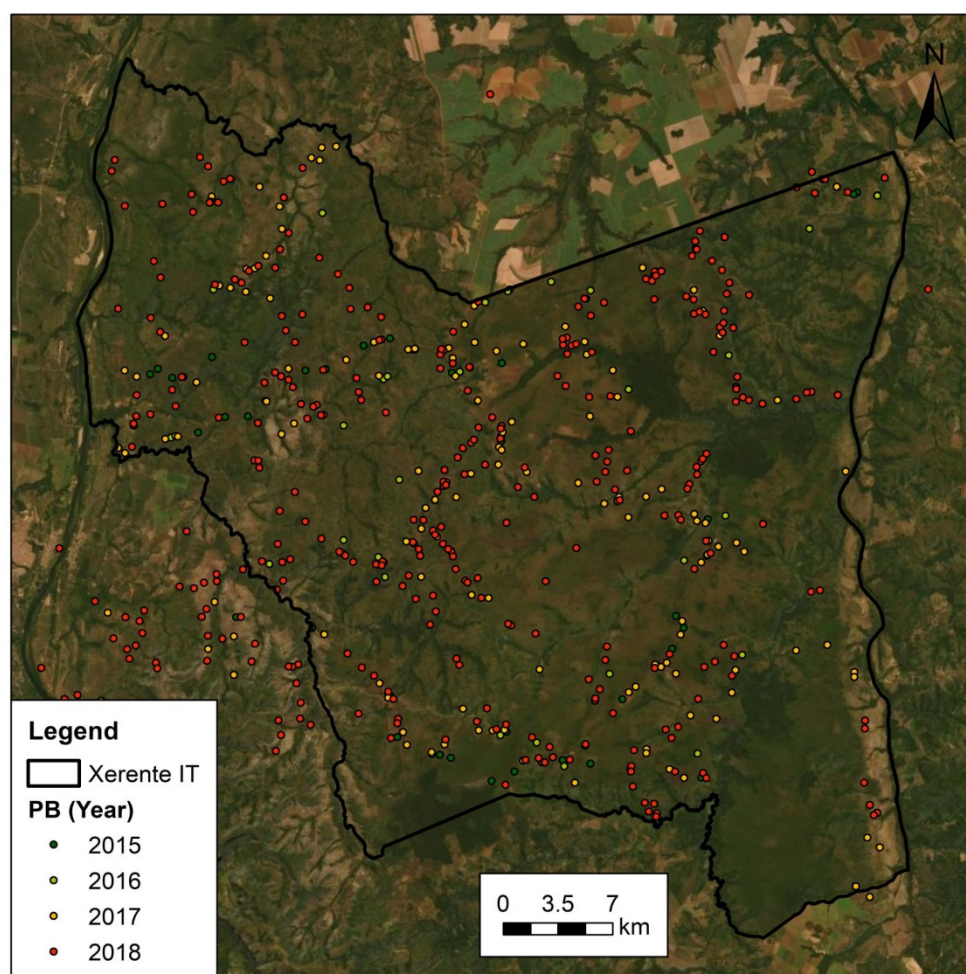

**Figure S1.** Prescribed burning (PB) over the Xerente IT between 2015 and 2018. Basemap: Google Satellite.

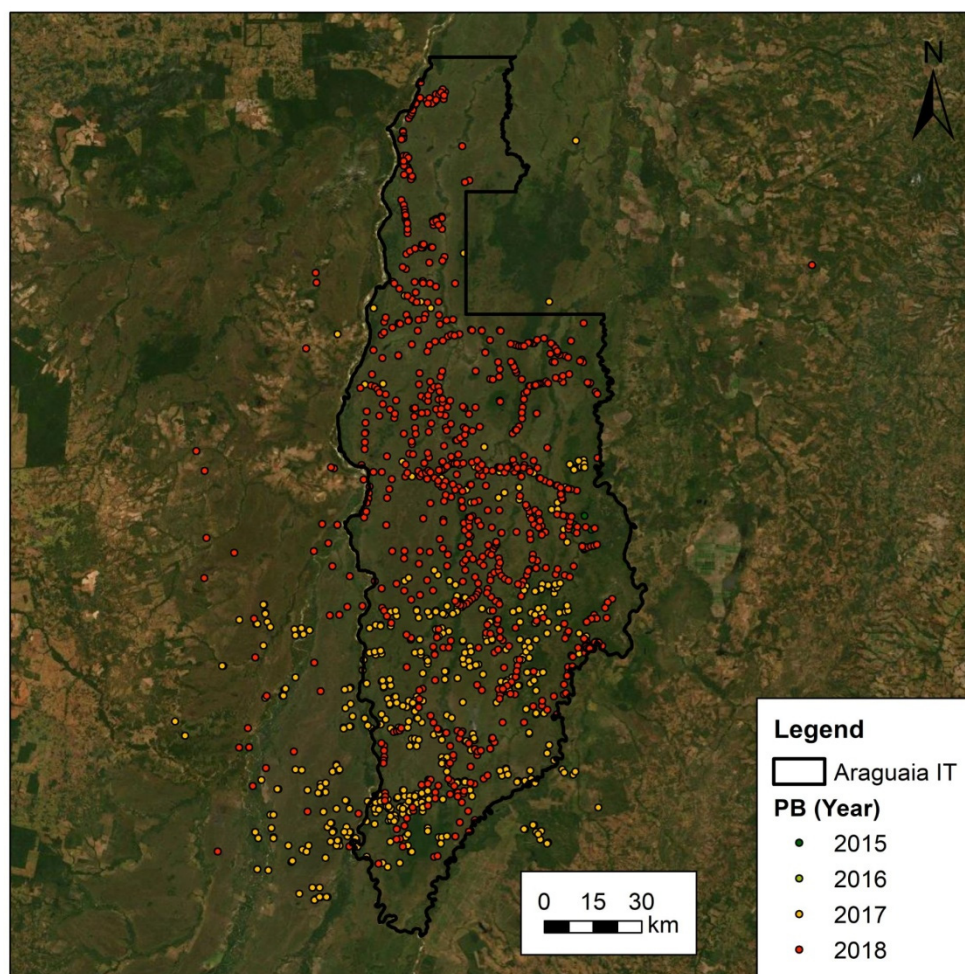

Figure S2. Same as Figure S1, but for Araguaia.

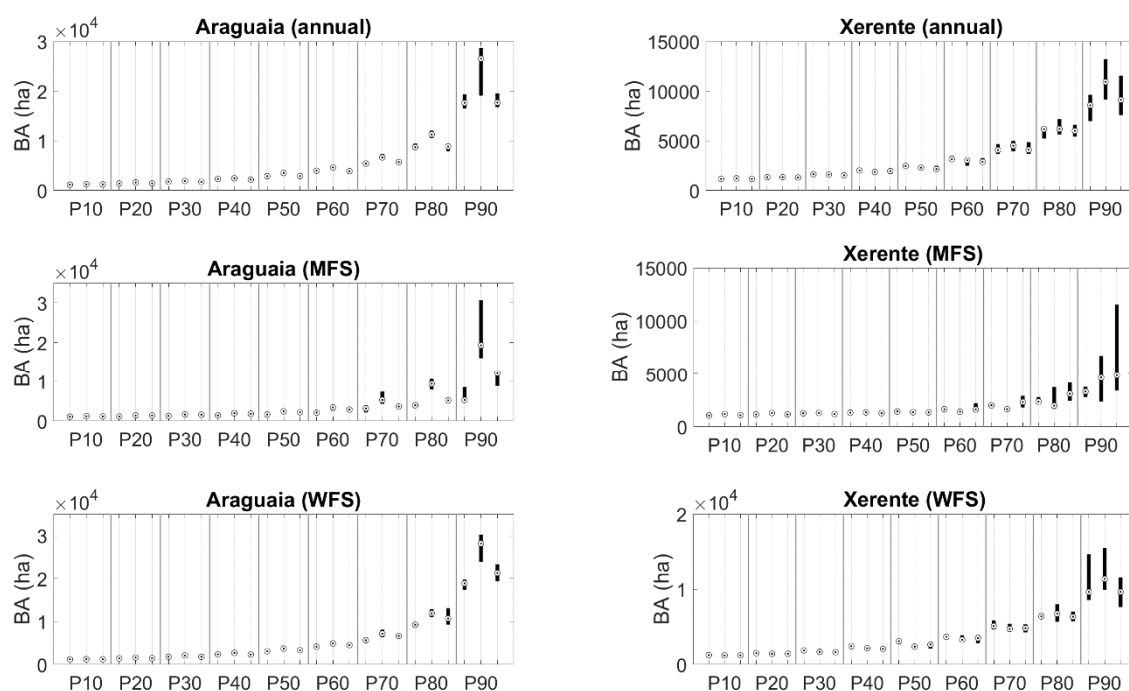

**Figure S3.** Boxplot showing values of burned area (BA) percentiles 10<sup>th</sup> to 90<sup>th</sup> for Araguaia (left columns) and Xerente (right columns) and for the entire years (upper row), MFS (middle row) and WFS (bottom row) for each group of 1000 samples generated by bootstrapping approach. Values for Phases 1, 2 and 3 are sequentially depicted for each percentile from 10<sup>th</sup> to 90<sup>th</sup>. The medians are represented by black circles.

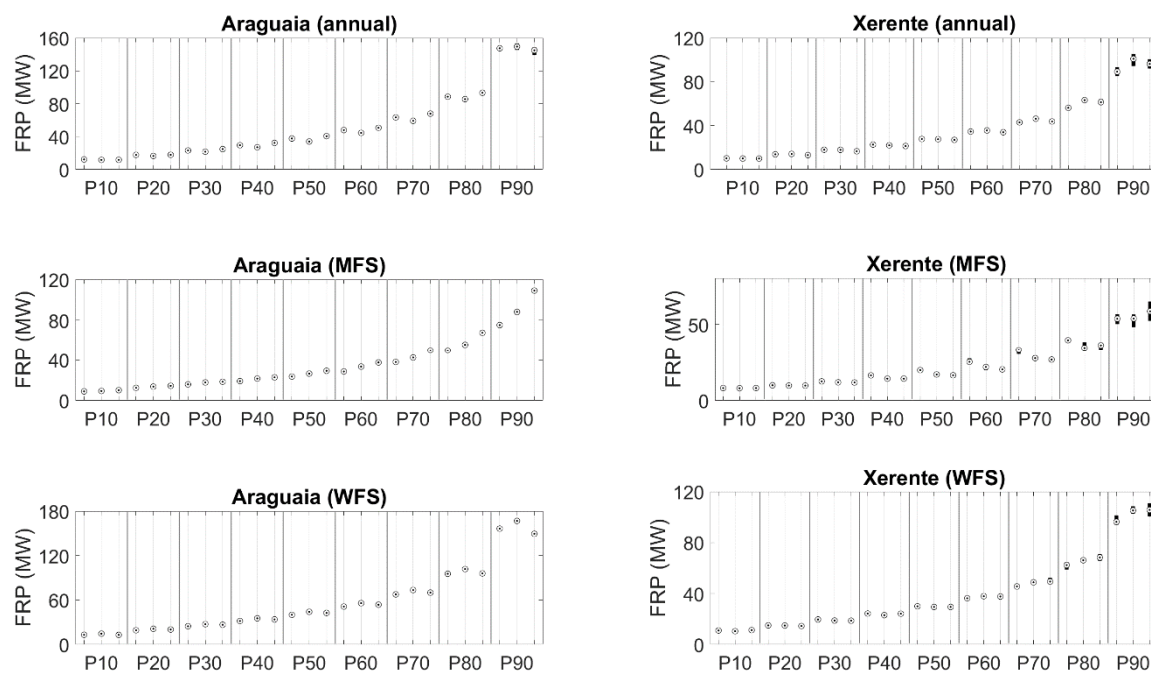

**Figure S4.** Same as in Figure S3, but for FRP.



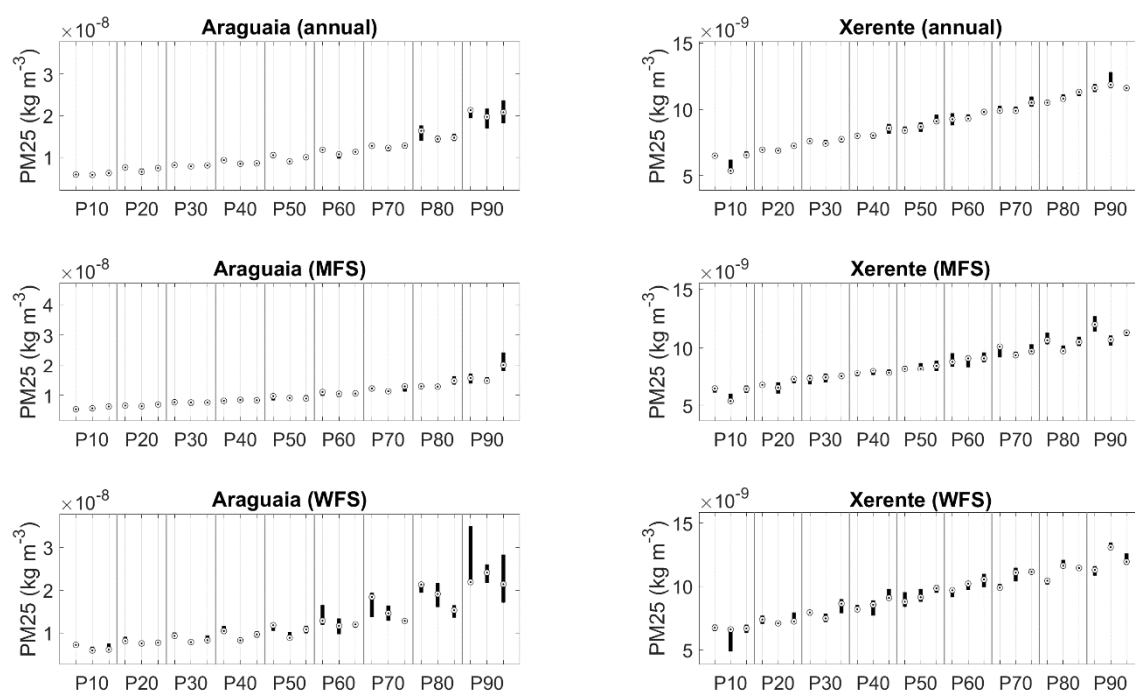

Figure S5. Same as in Figure S3, but for PM<sub>2.5</sub>.
